# Supplementary material
Source: PubMed Central journal article supplement (PMC6283294)

**Functional proteomics and deep network interrogation reveal a complex mechanism of action of midostaurin in lung cancer cells**

Claudia Ctordecka<sup>1</sup>, Vinayak Palve<sup>1</sup>, Brent M. Kuenzi<sup>1,2</sup>, Bin Fang<sup>3</sup>, Natalia J. Sumi<sup>1,2</sup>, Victoria Izumi<sup>3</sup>, Silvia Novakova<sup>1</sup>, Fumi Kinose<sup>4</sup>, Lily L. Remsing Rix<sup>1</sup>, Eric B. Haura<sup>4</sup>, John Matthew Koomen<sup>5</sup>, Uwe Rix<sup>1\*\*</sup>

1. Department of Drug Discovery, H. Lee Moffitt Cancer Center & Research Institute, Tampa, Florida 33612, United States
2. Cancer Biology PhD Program, University of South Florida, Tampa, Florida 33620, United States
3. Proteomics and Metabolomics Core, H. Lee Moffitt Cancer Center & Research Institute, Tampa, Florida 33612, United States
4. Department of Thoracic Oncology, H. Lee Moffitt Cancer Center & Research Institute, Tampa, Florida 33612, United States
5. Department of Molecular Oncology, H. Lee Moffitt Cancer Center & Research Institute, Tampa, Florida 33612, United States

Correspondence: [uwe.rix@moffitt.org](mailto:uwe.rix@moffitt.org)

Running title:

Analysis of midostaurin mechanism by functional proteomics

**Supplemental Figure S1.** Publicly available IC<sub>50</sub> data for inhibition of cell viability across large cancer cell line panel, grouped by tissue classification, generated by the Massachusetts General Hospital and the Sanger Institute. Plasma concentration of midostaurin is depicted in grey. Cell lines with a lower IC<sub>50</sub> value than 0.1 μM are labeled. *B*, Induction of apoptosis determined by Caspase 3/7 cleavage in A427 cells upon treatment with indicated concentrations of midostaurin, sotrastaurin or ruboxistaurin or vehicle control (DMSO) over a period of 72 hrs utilizing IncuCyte live cell analysis. Data was acquired every 3 hrs. Data points represent biological triplicates each performed in technical triplicate (mean). *C*, Detailed histogram representation of percent of cells in G1, S or G2 phase after 6 hrs of midostaurin treatment (0.5 and 1 μM) compared to vehicle control (DMSO) in A427 cells. Histograms are representative of three biological replicates.

**Supplemental Figure S2.** *A-C*, Replicate correlations of IRON-normalized intensity values for biological replicates of phosphoproteomics experiments (*A* = pY vehicle control (DMSO), *B* = pY midostaurin treated, *C* = global TMT data). Scale is log<sub>2</sub> intensity, histogram shows distribution of peptides. *D*, Boxplot showing the intensity distribution of IRON-normalized intensity values of the individual reporter ions from the global TMT phosphoproteomics experiment.

**Supplemental Figure S3.** Replicate correlations of IRON-normalized intensity values for dose-dependent midostaurin competition and sotrastaurin cross-competition pulldown experiments. Percent confidence interval (% CI) is shown.

**Supplemental Figure S4.** *A*, Viability of A427 cells following 72 hrs treatment with combinations of increasing concentrations of STO-609 (CAMKK2i) and 0.5 μM of GSK2334470 (PDPK1i), BX795 (TBK1i) and alisertib (AURKAi) determined by CellTiterGlo. Data depicts three biological replicates (mean ± SD). *B*, Evaluation of midostaurin effects on phosphorylation of AKT and the CAMKK2 downstream substrate AMPK in A427 cells following 3 hrs of treatment with increasing drug concentrations (0.1 μM, 0.5 μM, 1

μM). Image is representative of three biological replicates. C, Relative A427 cell counts upon 96 hrs siRNA-mediated knockdown of *TBK1*, *PDPK1* and/or *CAMKK2* and/or 72 hrs treatment with 0.5 μM alisertib. Data depicts three biological replicates each performed in technical triplicate (mean ± SD). Knockdown efficiency was determined using immunoblotting. NT, non-targeting siRNA. D, IC<sub>50</sub> values for inhibition of *in vitro* kinase activity of AURKA, TBK1 and PDPK1 by midostaurin and sotrastaurin are shown. DMSO: vehicle control.

**Supplemental Table S1.** Global phosphoproteomics (pSTY) dataset. Localization probability, phosphorylated amino acid, number of phosphorylation sites, peptide sequence, PEP score, phosphorylation probabilities, PTM position in the peptide, peptide charge, mass error, intensity and identification as potential contaminant is shown. Reporter ion 0 (channel 126, vehicle (DMSO) 1), reporter ion 1 (channel 127, vehicle (DMSO) 2), reporter ion 2 (channel 128, vehicle (DMSO) 3), reporter ion 3 (channel 129, Midostaurin 1), reporter ion 4 (channel 130, Midostaurin 2), reporter ion 5 (channel 131, Midostaurin 3).

**Supplemental Table S2.** Tyrosine phosphoproteomics (pY) dataset. Localization probability, phosphorylated amino acid, number of phosphorylation sites, peptide sequence, PEP score, phosphorylation probabilities, PTM position in the peptide, peptide charge, mass error, intensity and identification as potential contaminant is shown.

**Supplemental Table S3.** Chemical proteomics (CP) dataset. Uniprot accession identifiers, Q value, exclusive unique peptide count and ion intensities are shown. M: midostaurin; S: sotrastaurin; CT: competition treatment (using indicated compound concentration); PD: pulldown; PDoPD: pulldown of pulldown. Suffix indicates replicate series.

**Supplemental Table S4.** KEGG pathways enriched using the significantly modulated pY, pSTY phosphopeptides and direct midostaurin kinase targets. Shown is the DAVID output in addition with respective modules (Fig 4A) of the assigned genes.

## Supplemental Information

### MaxQuant Parameters (Chemical Proteomics)

Version 1.5.2.8  
 Fixed modifications Carbamidomethyl (C)  
 Decoy mode revert  
 Special AAs KR  
 Include contaminants True  
 MS/MS tol. (FTMS) 20 ppm  
 Top MS/MS peaks per 100 Da. (FTMS) 12  
 MS/MS deisotoping (FTMS) True  
 MS/MS tol. (ITMS) 0.5 Da  
 Top MS/MS peaks per 100 Da. (ITMS) 8  
 MS/MS deisotoping (ITMS) False  
 MS/MS tol. (TOF) 40 ppm  
 Top MS/MS peaks per 100 Da. (TOF) 10  
 MS/MS deisotoping (TOF) True  
 MS/MS tol. (Unknown) 0.5 Da  
 Top MS/MS peaks per 100 Da. (Unknown) 8  
 MS/MS deisotoping (Unknown) False  
 PSM FDR 0.01  
 Protein FDR 0.01  
 Site FDR 0.01  
 Use Normalized Ratios For Occupancy True  
 Min. peptide Length 7  
 Min. score for unmodified peptides 0  
 Min. score for modified peptides 40  
 Min. delta score for unmodified peptides 0  
 Min. delta score for modified peptides 6  
 Min. unique peptides 0  
 Min. razor peptides 1  
 Min. peptides 1

Use only unmodified peptides and      True  
 Modifications included in protein quantification Acetyl (Protein N-term);Oxidation (M)  
 Peptides used for protein quantification Razor  
 Discard unmodified counterpart peptides      True  
 Min. ratio count      1  
 Re-quantify      True  
 Use delta score False  
 iBAQ      False  
 iBAQ log fit      False  
 Match between runs      True  
 Matching time window [min]      10  
 Alignment time window [min]      20  
 Find dependent peptides      False  
 Fasta file      C:\MaxQuant 1.5.2.8\Databases\SwissProt\_Human\_2018\_05.fasta  
 Labeled amino acid filtering      True  
 Site tables      Oxidation (M)Sites.txt  
 Decoy mode      revert  
 Special AAs      KR  
 Include contaminants      True  
 RT shift False  
 Advanced ratios True  
 AIF correlation      0.47  
 First pass AIF correlation      0.8  
 AIF topx      20  
 AIF min mass      0  
 AIF SIL weight      4  
 AIF ISO weight      2  
 AIF iterative      True  
 AIF threshold FDR      0.01

### **MaxQuant Parameters (Tyrosine Phosphoproteomics)**

Version 1.2.2.5  
 Fixed modifications      Carbamidomethyl (C)  
 Randomize      FALSE  
 Special AAs      KR  
 Include contaminants      TRUE  
 MS/MS tol. (FTMS)      20 ppm  
 Top MS/MS peaks per 100 Da. (FTMS)      10  
 MS/MS deisotoping (FTMS)      TRUE

MS/MS tol. (ITMS) 0.5 Da  
 Top MS/MS peaks per 100 Da. (ITMS) 6  
 MS/MS deisotoping (ITMS) FALSE  
 MS/MS tol. (TOF) 0.1 Da  
 Top MS/MS peaks per 100 Da. (TOF) 6  
 MS/MS deisotoping (TOF) FALSE  
 MS/MS tol. (Unknown) 0.5 Da  
 Top MS/MS peaks per 100 Da. (Unknown) 6  
 MS/MS deisotoping (Unknown) FALSE  
 Peptide FDR 0.05  
 Max. peptide PEP 1  
 Protein FDR 0.2  
 Site FDR 0.05  
 Use Normalized Ratios For Occupancy TRUE  
 Apply site FDR separately TRUE  
 Min. peptide Length 6  
 Min. score 0  
 Min. unique peptides 0  
 Min. razor peptides 1  
 Min. peptides 1  
 Use only unmodified peptides and TRUE  
 Modifications included in protein quantification Oxidation (M);Acetyl (Protein N-term)  
 Peptides used for protein quantification Razor  
 Discard unmodified counterpart peptides TRUE  
 Min. ratio count 1  
 Lfq min. ratio count 1  
 Site quantification Use least modified peptide  
 Re-quantify TRUE  
 Keep low-scoring versions of identified peptides No  
 Label-free protein quantification TRUE  
 iBAQ FALSE  
 iBAQ log fit TRUE  
 MS/MS recalibration FALSE  
 Match between runs TRUE  
 Time window [min] 10  
 Find dependent peptides FALSE  
 Fasta file C:\MaxQuant 1.2.2.5\Database\SwissProt\_HUMAN\_2015\_12.fasta  
 Experimental design file C:\MaxQuant  
 1.2.2.5\Data\Rix\_Claudia\_pY\combined\experimentalDesignTemplate.txt  
 Labeled amino acid filtering TRUE  
 Site tables Oxidation (M)Sites.txt;Phospho (STY)Sites.txt  
 Cut peaks TRUE

Randomize FALSE  
 Special AAs KR  
 Include contaminants TRUE  
 AIF correlation 0.8  
 AIF topx 50  
 AIF min mass 0  
 AIF SIL weight 4  
 AIF ISO weight 2  
 AIF iterative FALSE  
 AIF threshold FDR 0.01

### Tyrosine Phosphoproteomics Scaffold parameters

Scaffold: Version: Scaffold\_4.3.4 Protein Grouping Strategy: Experiment-wide grouping with protein cluster analysis

Peptide Thresholds: 95.0% minimum  
 Protein Thresholds: 20.0% minimum and 1 peptide minimum  
 Peptide FDR: 0.6% (Prophet)  
 Protein FDR: 2.7% (Prophet)

### Tyrosine Phosphoproteomics sample specification

| Category | Bio Sample | #Prot | #IDs | #Spec | %IDs       |
|----------|------------|-------|------|-------|------------|
| M        | M1         | 1057  | 7489 | 42446 | 0.17643595 |
| M        | M2         | 1060  | 8359 | 45038 | 0.18559882 |
| M        | M3         | 1095  | 9096 | 47186 | 0.19276904 |
| D        | D1         | 1078  | 7415 | 41529 | 0.17854993 |
| D        | D2         | 1136  | 8239 | 45699 | 0.1802884  |
| D        | D3         | 1065  | 8329 | 46004 | 0.18104948 |

### MaxQuant Parameters (Global Phosphoproteomics)

Version 1.5.2.8  
 Fixed modifications Carbamidomethyl (C)  
 Decoy mode revert  
 Special AAs KR  
 Include contaminants True  
 MS/MS tol. (FTMS) 20 ppm  
 Top MS/MS peaks per 100 Da. (FTMS) 12  
 MS/MS deisotoping (FTMS) True  
 MS/MS tol. (ITMS) 0.5 Da  
 Top MS/MS peaks per 100 Da. (ITMS) 8  
 MS/MS deisotoping (ITMS) False  
 MS/MS tol. (TOF) 40 ppm

Top MS/MS peaks per 100 Da. (TOF) 10  
 MS/MS deisotoping (TOF) True  
 MS/MS tol. (Unknown) 0.5 Da  
 Top MS/MS peaks per 100 Da. (Unknown) 8  
 MS/MS deisotoping (Unknown) False  
 PSM FDR 0.05  
 Protein FDR 0.2  
 Site FDR 0.05  
 Use Normalized Ratios For Occupancy True  
 Min. peptide Length 7  
 Min. score for unmodified peptides 0  
 Min. score for modified peptides 40  
 Min. delta score for unmodified peptides 0  
 Min. delta score for modified peptides 6  
 Min. unique peptides 0  
 Min. razor peptides 1  
 Min. peptides 1  
 Use only unmodified peptides and True  
 Modifications included in protein quantification Acetyl (Protein N-term);Oxidation (M)  
 Peptides used for protein quantification Razor  
 Discard unmodified counterpart peptides True  
 Min. ratio count 1  
 Re-quantify True  
 Use delta score False  
 iBAQ False  
 iBAQ log fit False  
 Match between runs False  
 Find dependent peptides False  
 Fasta file C:\MaxQuant 1.5.2.8\Databases\SwissProt\_Human\_2018\_05.fasta  
 Labeled amino acid filtering True  
 Site tables Oxidation (M)Sites.txt;Phospho (STY)Sites.txt  
 Decoy mode revert  
 Special AAs KR  
 Include contaminants True  
 RT shift False  
 Advanced ratios True  
 AIF correlation 0.47  
 First pass AIF correlation 0.8  
 AIF topx 20  
 AIF min mass 0  
 AIF SIL weight 4  
 AIF ISO weight 2



AIF iterative True  
AIF threshold FDR 0.01

### Global Phosphoproteomics Scaffold parameters

Scaffold: Version: Scaffold\_4.8.7

Peptide Thresholds: 95,0% minimum

Protein Thresholds: 20,0% minimum and 1 peptide minimum

Peptide FDR: 3,5% (Prophet)

Protein FDR: 6,1% (Prophet)

### Global Phosphoproteomics sample specifications

| Bio Sample             | #Prot | #IDs | #Spec | %IDs      |
|------------------------|-------|------|-------|-----------|
| MidoTMT-IMAC_Fx1_run1  | 229   | 9    | 25023 | 3.60E-04  |
| MidoTMT-IMAC_Fx1_run2  | 225   | 5    | 25169 | 1.99E-04  |
| MidoTMT-IMAC_Fx2_run1  | 258   | 17   | 25390 | 6.70E-04  |
| MidoTMT-IMAC_Fx2_run2  | 252   | 4    | 25610 | 1.56E-04  |
| MidoTMT-IMAC_Fx3_run1  | 238   | 17   | 24634 | 6.90E-04  |
| MidoTMT-IMAC_Fx3_run2  | 219   | 26   | 24963 | 0.0010415 |
| MidoTMT-IMAC_Fx4_run1  | 231   | 9    | 24779 | 3.63E-04  |
| MidoTMT-IMAC_Fx4_run2  | 241   | 36   | 24477 | 0.0014708 |
| MidoTMT-IMAC_Fx5_run1  | 330   | 124  | 25324 | 0.0048965 |
| MidoTMT-IMAC_Fx5_run2  | 319   | 114  | 25189 | 0.0045258 |
| MidoTMT-IMAC_Fx6_run1  | 276   | 46   | 23068 | 0.0019941 |
| MidoTMT-IMAC_Fx6_run2  | 280   | 54   | 22808 | 0.0023676 |
| MidoTMT-IMAC_Fx7_run1  | 266   | 60   | 23253 | 0.0025803 |
| MidoTMT-IMAC_Fx7_run2  | 255   | 40   | 22626 | 0.0017679 |
| MidoTMT-IMAC_Fx8_run1  | 279   | 30   | 24910 | 0.0012043 |
| MidoTMT-IMAC_Fx8_run2  | 269   | 25   | 25196 | 9.92E-04  |
| MidoTMT-IMAC_Fx9_run1  | 208   | 2    | 24769 | 8.07E-05  |
| MidoTMT-IMAC_Fx9_run2  | 234   | 15   | 25324 | 5.92E-04  |
| MidoTMT-IMAC_Fx10_run1 | 244   | 10   | 25129 | 3.98E-04  |
| MidoTMT-IMAC_Fx10_run2 | 258   | 21   | 25735 | 8.16E-04  |
| MidoTMT-IMAC_Fx11_run1 | 252   | 10   | 26248 | 3.81E-04  |
| MidoTMT-IMAC_Fx11_run2 | 232   | 18   | 25372 | 7.09E-04  |
| MidoTMT-IMAC_Fx12_run1 | 227   | 12   | 24967 | 4.81E-04  |
| MidoTMT-IMAC_Fx12_run2 | 224   | 7    | 25100 | 2.79E-04  |

**A**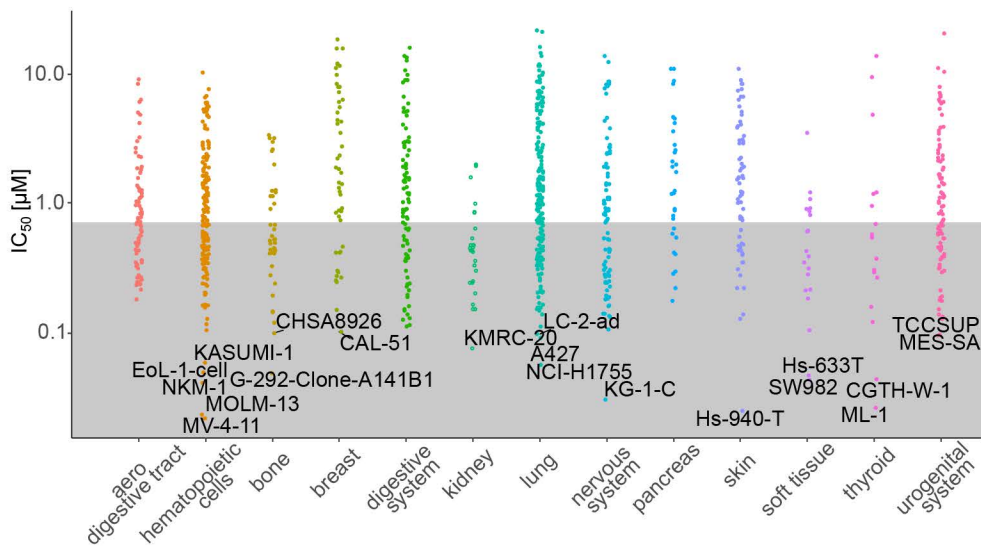**B**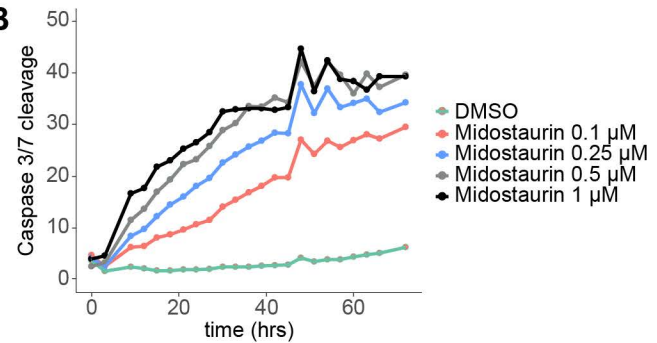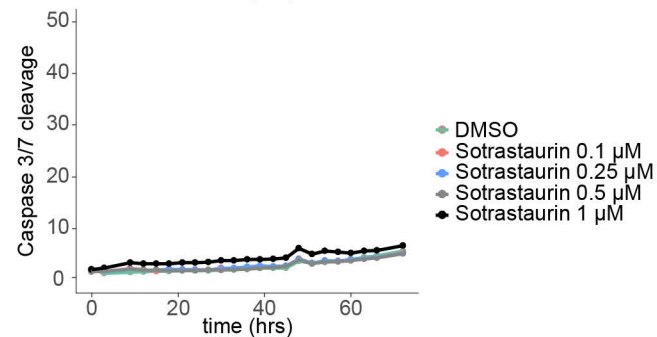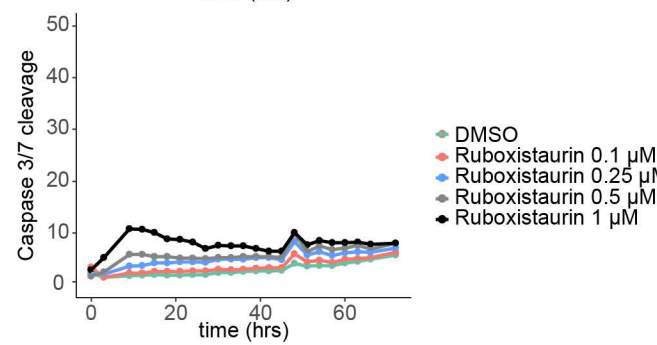**C**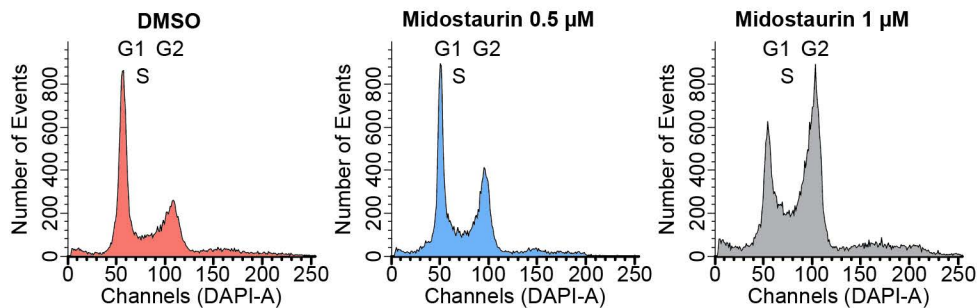

**A**

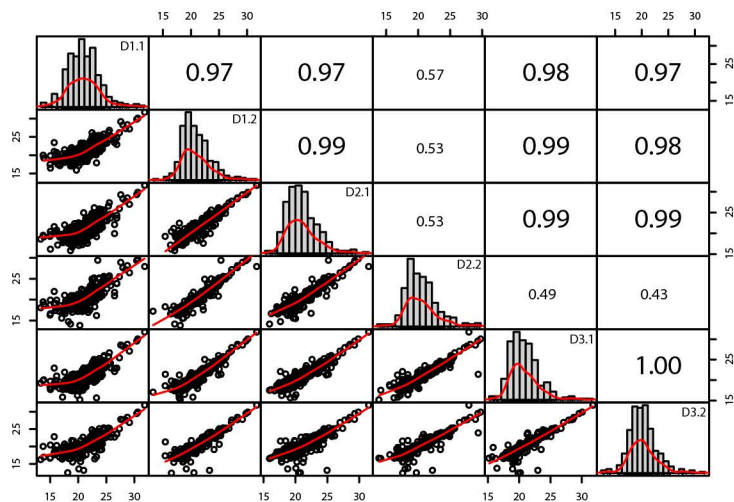

**B**

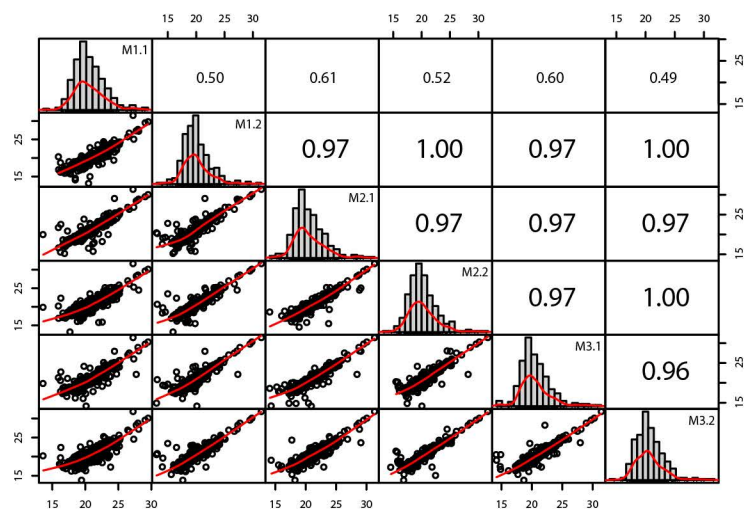

**C**

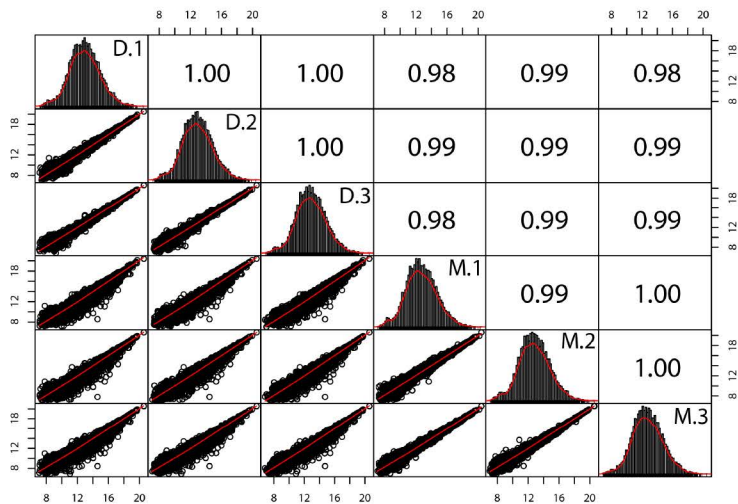

**D**

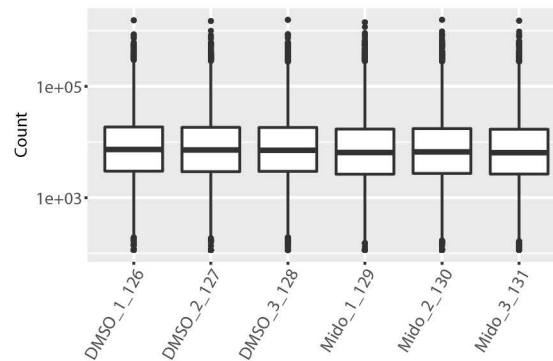

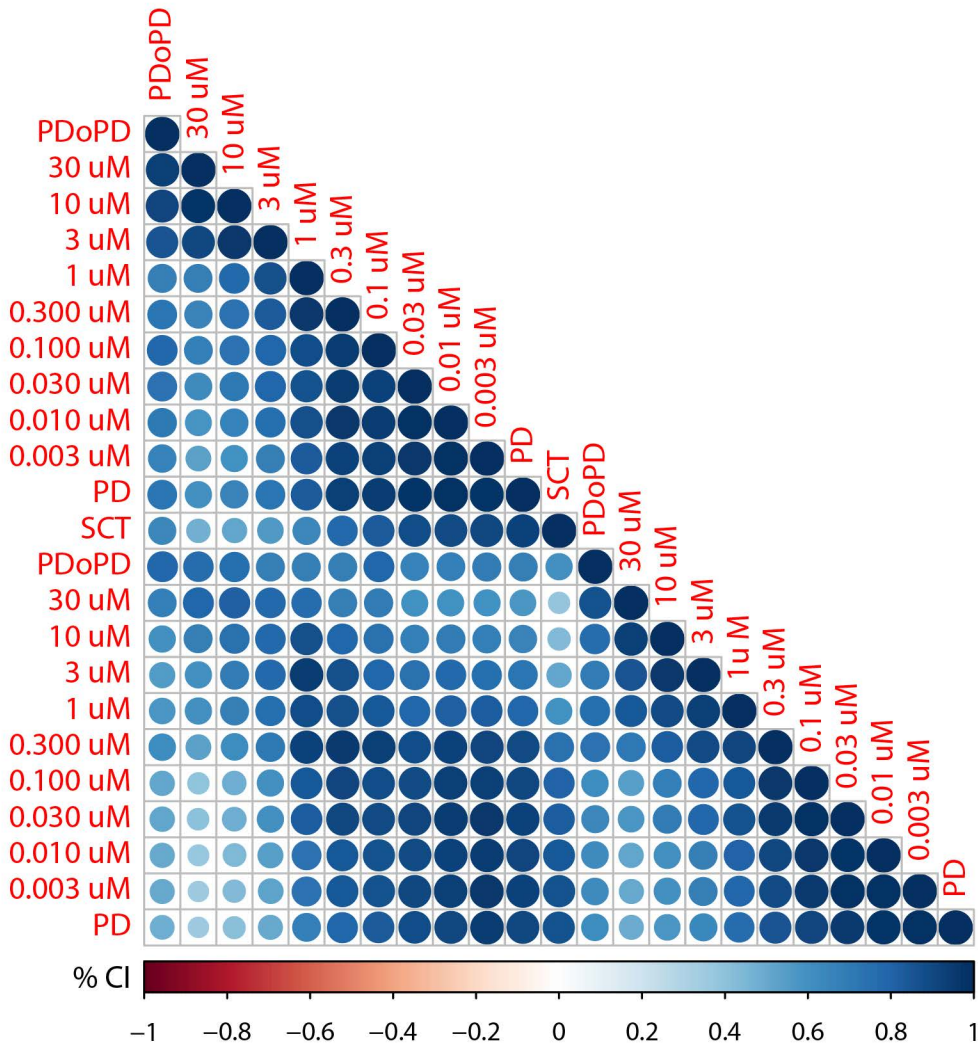

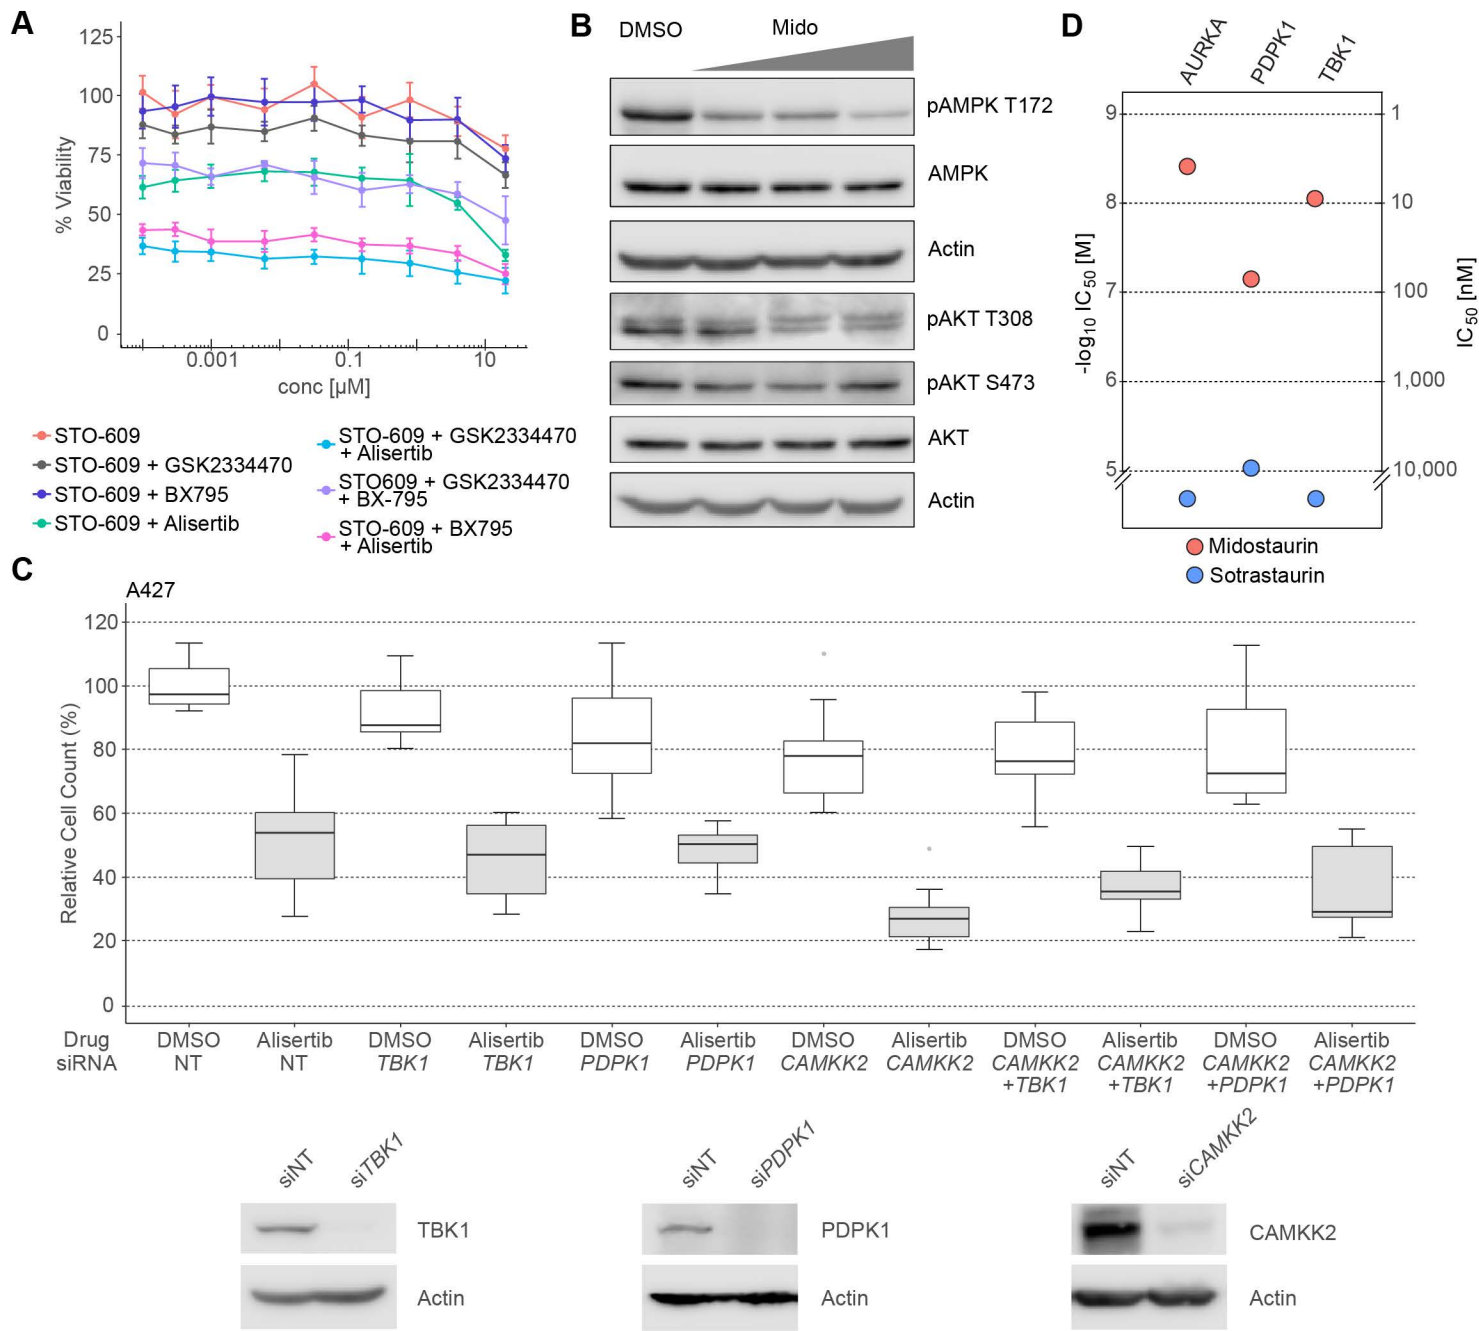

Supplement: 136360_1_supp_185828_pf0hs6.pdf [file 136360_1_supp_185828_pf0hs6.pdf]
